# Supplementary material
Source: PubMed Central journal article supplement (PMC5546009)

## Inhibition of *Salmonella* invasion

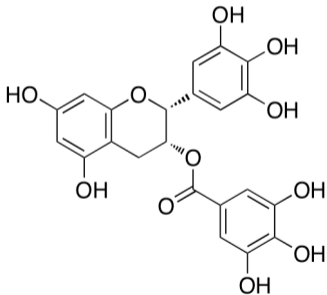

epigallocatechin-3-gallate

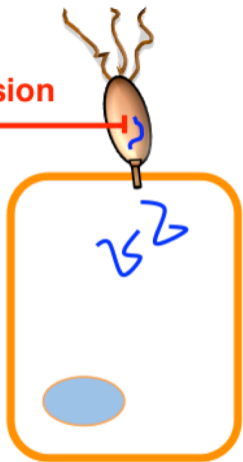

host cell

Supplement: NIHMS886338-supplement-gAbstract.pdf [file NIHMS886338-supplement-gAbstract.pdf]
